# Supplementary material
Source: PubMed Central journal article supplement (PMC3512166)
Supplement: NIHMS50584-supplement-Supplementary_Tables.pdf [file NIHMS50584-supplement-Supplementary_Tables.pdf]

**TABLE 1S - TOP 100 GENES UPREGULATED BY 9-AMINAOACRIDINE IN CFBE41o- CELLS**

| Gene symbol  | Description                                                                               | fold-increase |      |
|--------------|-------------------------------------------------------------------------------------------|---------------|------|
|              |                                                                                           | CFBE41o-      | BE * |
| 1 CXCR4      | chemokine (C-X-C motif) receptor 4                                                        | 2383.0        |      |
| 2 PCDH10     | protocadherin 10                                                                          | 1111.1        |      |
| 3 INSM2      | insulinoma-associated 2                                                                   | 1000.4        |      |
| 4 C20orf160  | chromosome 20 open reading frame 160                                                      | 913.9         |      |
| 5 NPTX2      | neuronal pentraxin II                                                                     | 815.9         |      |
| 6 SLC16A10   | solute carrier family 16 (monocarboxylic acid transporters), member 10                    | 772.9         |      |
| 7 PCDH8      | protocadherin 8                                                                           | 745.6         |      |
| 8 ARC        | activity-regulated cytoskeleton-associated protein                                        | 737.6         |      |
| 9 C11orf43   | chromosome 11 open reading frame 43                                                       | 690.0         |      |
| 10 FOSB      | FBJ murine osteosarcoma viral oncogene homolog B                                          | 652.3         |      |
| 11 NEFH      | neurofilament, heavy polypeptide 200kDa                                                   | 650.2         |      |
| 12 HBA1      | hemoglobin, alpha 1                                                                       | 622.6         |      |
| 13 ADAMTS1   | ADAM metalloproteinase with thrombospondin type 1 motif, 1                                | 600.3         |      |
| 14 PCDH17    | protocadherin 17                                                                          | 560.5         |      |
| 15 HIST1H4H  | histone 1, H4h                                                                            | 553.2         | 9.8  |
| 16 DLX2      | distal-less homeobox 2                                                                    | 548.5         |      |
| 17 ETV7      | ets variant gene 7 (TEL2 oncogene)                                                        | 500.9         | 2.2  |
| 18 DIO3      | deiodinase, iodothyronine, type III                                                       | 498.4         |      |
| 19 HBA2      | hemoglobin, alpha 2                                                                       | 488.5         |      |
| 20 IL17RB    | interleukin 17 receptor B                                                                 | 471.9         |      |
| 21 TAC1      | tachykinin, precursor 1                                                                   | 470.1         |      |
| 22 DDIT4L    | DNA-damage-inducible transcript 4-like                                                    | 463.5         |      |
| 23 TMEFF2    | transmembrane protein with EGF-like and two follistatin-like domains 2                    | 463.1         |      |
| 24 RGS16     | regulator of G-protein signalling 16                                                      | 433.9         |      |
| 25 NEF3      | neurofilament 3 (150kDa medium)                                                           | 423.0         |      |
| 26 PRIMA1    | proline rich membrane anchor 1                                                            | 413.3         |      |
| 27 EOMES     | eomesodermin homolog (Xenopus laevis)                                                     | 408.0         |      |
| 28 CABYR     | calcium binding tyrosine-(Y)-phosphorylation regulated (fibrousheathin 2)                 | 382.9         | 3.2  |
| 29 EGR2      | early growth response 2 (Krox-20 homolog, Drosophila)                                     | 382.1         |      |
| 30 CYP1A1    | cytochrome P450, family 1, subfamily A, polypeptide 1                                     | 372.4         | 4.1  |
| 31 GFPT2     | glutamine-fructose-6-phosphate transaminase 2                                             | 366.8         |      |
| 32 CITED1    | Cbp/p300-interacting transactivator, with Glu/Asp-rich carboxy-terminal domain, 1         | 361.1         |      |
| 33 ZCCHC12   | zinc finger, CCHC domain containing 12                                                    | 354.8         |      |
| 34 CLU       | clusterin                                                                                 | 343.3         |      |
| 35 TEX14     | testis expressed sequence 14                                                              | 342.6         |      |
| 36 EGR4      | early growth response 4                                                                   | 336.2         |      |
| 37 TNFSF9    | tumor necrosis factor (ligand) superfamily, member 9                                      | 328.9         |      |
| 38 BMP2      | bone morphogenetic protein 2                                                              | 325.7         |      |
| 39 SNAI1     | snail homolog 1 (Drosophila)                                                              | 322.8         | 2.2  |
| 40 IGF2      | insulin-like growth factor 2 (somatomedin A)                                              | 311.4         |      |
| 41 FGF19     | fibroblast growth factor 19                                                               | 300.9         |      |
| 42 ID2       | inhibitor of DNA binding 2, dominant negative helix-loop-helix protein                    | 295.0         | 2.1  |
| 43 NRIP3     | nuclear receptor interacting protein 3                                                    | 285.3         | 2.1  |
| 44 HOXD1     | homeobox D1                                                                               | 275.3         |      |
| 45 FOS       | v-fos FBJ murine osteosarcoma viral oncogene homolog                                      | 274.5         |      |
| 46 RND1      | Rho family GTPase 1                                                                       | 271.4         |      |
| 47 PCDH9     | protocadherin 9                                                                           | 262.3         |      |
| 48 HAS3      | hyaluronan synthase 3                                                                     | 257.5         |      |
| 49 HIST1H2AE | histone 1, H2ae                                                                           | 253.5         | 5.2  |
| 50 PTGS2     | prostaglandin-endoperoxide synthase 2 (prostaglandin G/H synthase and cyclooxygenase)     | 253.2         |      |
| 51 C19orf30  | chromosome 19 open reading frame 30                                                       | 251.3         |      |
| 52 EPHA4     | EPH receptor A4                                                                           | 240.2         |      |
| 53 AQP1      | aquaporin 1 (Colton blood group)                                                          | 239.6         |      |
| 54 CRYBA2    | crystallin, beta A2                                                                       | 237.3         |      |
| 55 SH3GL2    | SH3-domain GRB2-like 2                                                                    | 221.8         |      |
| 56 ERO1LB    | ERO1-like beta (S. cerevisiae)                                                            | 220.5         |      |
| 57 MSX1      | msh homeobox homolog 1 (Drosophila)                                                       | 212.5         |      |
| 58 SBSN      | NA                                                                                        | 212.2         |      |
| 59 OLIG2     | oligodendrocyte lineage transcription factor 2                                            | 207.4         |      |
| 60 UCN       | urocortin                                                                                 | 205.2         |      |
| 61 RASD1     | RAS, dexamethasone-induced 1                                                              | 199.4         |      |
| 62 TNFRSF10D | tumor necrosis factor receptor superfamily, member 10d, decoy with truncated death domain | 198.8         |      |
| 63 CRISPLD2  | cysteine-rich secretory protein LCCL domain containing 2                                  | 197.5         | 3.6  |
| 64 CTH       | cystathionase (cystathionine gamma-lyase)                                                 | 195.6         |      |
| 65 KRT14     | keratin 14 (epidermolysis bullosa simplex, Dowling-Meara, Koebner)                        | 187.7         |      |
| 66 NHLH2     | nescient helix loop helix 2                                                               | 185.7         |      |
| 67 HAMP      | hepcidin antimicrobial peptide                                                            | 182.1         |      |

|     |           |                                                                                   |       |     |
|-----|-----------|-----------------------------------------------------------------------------------|-------|-----|
| 68  | C10orf10  | chromosome 10 open reading frame 10                                               | 181.2 |     |
| 69  | RGC32     | NA                                                                                | 178.1 |     |
| 70  | RGS2      | regulator of G-protein signalling 2, 24kDa                                        | 175.5 |     |
| 71  | ATF3      | activating transcription factor 3                                                 | 171.3 | 2.4 |
| 72  | TNNC1     | troponin C type 1 (slow)                                                          | 170.6 |     |
| 73  | CYP26B1   | cytochrome P450, family 26, subfamily B, polypeptide 1                            | 169.1 | 2.4 |
| 74  | SPON2     | spondin 2, extracellular matrix protein                                           | 168.8 |     |
| 75  | VIM       | vimentin                                                                          | 167.2 |     |
| 76  | HAND1     | heart and neural crest derivatives expressed 1                                    | 165.0 |     |
| 77  | KRTAP2-1  | keratin associated protein 2-1                                                    | 160.6 |     |
| 78  | SLC13A5   | solute carrier family 13 (sodium-dependent citrate transporter), member 5         | 158.9 |     |
| 79  | HBZ       | hemoglobin, zeta                                                                  | 156.8 |     |
| 80  | STC1      | stanniocalcin 1                                                                   | 155.1 |     |
| 81  | SOST      | sclerosteosis                                                                     | 154.7 |     |
| 82  | COMP      | cartilage oligomeric matrix protein                                               | 151.9 | 2.1 |
| 83  | SHOX2     | short stature homeobox 2                                                          | 151.4 |     |
| 84  | SOX8      | SRY (sex determining region Y)-box 8                                              | 150.0 |     |
| 85  | JAG1      | jagged 1 (Alagille syndrome)                                                      | 145.4 |     |
| 86  | HIST1H3J  | histone 1, H3j                                                                    | 141.0 |     |
| 87  | ID4       | inhibitor of DNA binding 4, dominant negative helix-loop-helix protein            | 139.4 |     |
| 88  | ZIC2      | Zic family member 2 (odd-paired homolog, Drosophila)                              | 139.4 |     |
| 89  | CDKN1C    | cyclin-dependent kinase inhibitor 1C (p57, Kip2)                                  | 138.2 |     |
| 90  | CSH2      | chorionic somatomammotropin hormone 2                                             | 137.6 |     |
| 91  | NPY       | neuropeptide Y                                                                    | 137.3 |     |
| 92  | FAM90A1   | family with sequence similarity 90, member A1                                     | 134.7 |     |
| 93  | LRAT      | lecithin retinol acyltransferase (phosphatidylcholine--retinol O-acyltransferase) | 133.8 |     |
| 94  | IRF4      | interferon regulatory factor 4                                                    | 132.9 |     |
| 95  | KRTAP1-5  | keratin associated protein 1-5                                                    | 132.8 |     |
| 96  | HSPA6     | heat shock 70kDa protein 6 (HSP70B')                                              | 130.8 |     |
| 97  | CSH1      | chorionic somatomammotropin hormone 1 (placental lactogen)                        | 129.9 |     |
| 98  | SOX2      | SRY (sex determining region Y)-box 2                                              | 125.6 |     |
| 99  | KCTD12    | potassium channel tetramerisation domain containing 12                            | 123.7 |     |
| 100 | HIST1H2AM | histone 1, H2am                                                                   | 123.1 |     |

\* BE: fold-increase in primary bronchial epithelial cells (genes with > 2-fold increase)

**TABLE 2S - TOP 100 GENES UPREGULATED BY CICLOPIROX IN CFBE41o- CELLS**

| Gene symbol | Description                                                                                 | fold-increase |      |
|-------------|---------------------------------------------------------------------------------------------|---------------|------|
|             |                                                                                             | CFBE41o-      | BE * |
| 1 GLS2      | glutaminase 2 (liver, mitochondrial)                                                        | 241.4         |      |
| 2 FAM13C1   | family with sequence similarity 13, member C1                                               | 211.4         |      |
| 3 RASAL1    | RAS protein activator like 1 (GAP1 like)                                                    | 202.5         |      |
| 4 COL2A1    | collagen, type II, alpha 1 (primary osteoarthritis, spondyloepiphyseal dysplasia, congenit) | 197.3         |      |
| 5 DPYSL4    | dihydropyrimidinase-like 4                                                                  | 196.3         | 2.1  |
| 6 CLCA2     | chloride channel, calcium activated, family member 2                                        | 171.9         |      |
| 7 LCE1B     | late cornified envelope 1B                                                                  | 170.6         |      |
| 8 MYO10     | myosin X                                                                                    | 165.8         | 5.6  |
| 9 XDH       | xanthine dehydrogenase                                                                      | 153.1         | 2.3  |
| 10 CDH10    | cadherin 10, type 2 (T2-cadherin)                                                           | 152.5         |      |
| 11 ATF3     | activating transcription factor 3                                                           | 135.5         | 4.2  |
| 12 PVT1     | Pvt1 oncogene homolog, MYC activator (mouse)                                                | 133.4         |      |
| 13 BTG2     | BTG family, member 2                                                                        | 118.7         |      |
| 14 PGAP1    | NA                                                                                          | 115.8         |      |
| 15 GNAS     | GNAS complex locus                                                                          | 112.4         |      |
| 16 C4orf9   | chromosome 4 open reading frame 9                                                           | 109.8         |      |
| 17 MDM2     | Mdm2, transformed 3T3 cell double minute 2, p53 binding protein (mouse)                     | 109.6         |      |
| 18 CYP4F2   | cytochrome P450, family 4, subfamily F, polypeptide 2                                       | 103.2         |      |
| 19 ABCA12   | ATP-binding cassette, sub-family A (ABC1), member 12                                        | 99.7          |      |
| 20 CRYAB    | crystallin, alpha B                                                                         | 97.3          |      |
| 21 KIAA1324 | KIAA1324                                                                                    | 95.1          |      |
| 22 POLH     | polymerase (DNA directed), eta                                                              | 89.1          |      |
| 23 RGS2     | regulator of G-protein signalling 2, 24kDa                                                  | 89.0          |      |
| 24 PANK1    | pantothenate kinase 1                                                                       | 82.8          |      |
| 25 GDF9     | growth differentiation factor 9                                                             | 80.0          |      |
| 26 DSC3     | desmocollin 3                                                                               | 78.0          |      |
| 27 IKIP     | NA                                                                                          | 75.3          |      |
| 28 CSTA     | cystatin A (stefin A)                                                                       | 75.0          |      |
| 29 UNQ2541  | NA                                                                                          | 73.6          |      |
| 30 JAG1     | jagged 1 (Alagille syndrome)                                                                | 67.7          |      |
| 31 PTGS2    | prostaglandin-endoperoxide synthase 2 (prostaglandin G/H synthase and cyclooxygenase)       | 66.9          |      |
| 32 WDR66    | WD repeat domain 66                                                                         | 64.1          |      |
| 33 ADRB2    | adrenergic, beta-2-, receptor, surface                                                      | 62.2          |      |
| 34 CENTG3   | centaurin, gamma 3                                                                          | 61.6          |      |
| 35 NHLH2    | nescient helix loop helix 2                                                                 | 61.4          |      |
| 36 KCTD12   | potassium channel tetramerisation domain containing 12                                      | 61.3          |      |
| 37 CSPG2    | chondroitin sulfate proteoglycan 2 (versican)                                               | 60.2          |      |
| 38 GRHL3    | grainyhead-like 3 (Drosophila)                                                              | 59.0          | 2.2  |
| 39 IBRDC2   | IBR domain containing 2                                                                     | 58.9          |      |
| 40 RAB38    | RAB38, member RAS oncogene family                                                           | 56.8          |      |
| 41 CIAS1    | cold autoinflammatory syndrome 1                                                            | 56.6          |      |
| 42 SIPA1L2  | signal-induced proliferation-associated 1 like 2                                            | 56.1          |      |
| 43 GDF15    | growth differentiation factor 15                                                            | 55.2          |      |
| 44 ZNF654   | zinc finger protein 654                                                                     | 53.8          |      |
| 45 SLCO4A1  | solute carrier organic anion transporter family, member 4A1                                 | 53.8          | 9.5  |
| 46 DNAH5    | dynein, axonemal, heavy polypeptide 5                                                       | 53.2          |      |
| 47 PNLIPRP2 | pancreatic lipase-related protein 2                                                         | 51.9          |      |
| 48 DNAJC18  | DnaJ (Hsp40) homolog, subfamily C, member 18                                                | 51.1          |      |
| 49 NDRG1    | N-myc downstream regulated gene 1                                                           | 50.4          |      |
| 50 RNASE7   | ribonuclease, RNase A family, 7                                                             | 50.2          | 3.1  |
| 51 COBLL1   | COBL-like 1                                                                                 | 50.2          |      |
| 52 ETNK1    | ethanolamine kinase 1                                                                       | 50.1          |      |
| 53 NPPB     | natriuretic peptide precursor B                                                             | 49.8          |      |
| 54 MAK      | male germ cell-associated kinase                                                            | 48.0          |      |
| 55 MR1      | major histocompatibility complex, class I-related                                           | 47.6          |      |
| 56 NALP1    | NACHT, leucine rich repeat and PYD (pyrin domain) containing 1                              | 46.8          |      |
| 57 DUSP5    | dual specificity phosphatase 5                                                              | 46.5          | 5.6  |
| 58 RORA     | RAR-related orphan receptor A                                                               | 45.5          | 3.8  |
| 59 TEK      | TEK tyrosine kinase, endothelial (venous malformations, multiple cutaneous and mucosal)     | 45.1          | 2.2  |
| 60 SCN3B    | sodium channel, voltage-gated, type III, beta                                               | 45.0          |      |
| 61 C1orf183 | chromosome 1 open reading frame 183                                                         | 44.0          |      |
| 62 NRG1     | neuregulin 1                                                                                | 43.8          |      |
| 63 GGT6     | gamma-glutamyltransferase 6 homolog (rat)                                                   | 43.7          |      |
| 64 TREM2    | triggering receptor expressed on myeloid cells 2                                            | 43.7          |      |
| 65 CNTNAP3B | contactin associated protein-like 3B                                                        | 43.4          |      |
| 66 CYP4F3   | cytochrome P450, family 4, subfamily F, polypeptide 3                                       | 43.2          |      |
| 67 KITLG    | KIT ligand                                                                                  | 43.2          |      |
| 68 AKR1B10  | aldo-keto reductase family 1, member B10 (aldose reductase)                                 | 42.7          |      |

|     |           |                                                                                  |      |     |
|-----|-----------|----------------------------------------------------------------------------------|------|-----|
| 69  | CNTNAP3   | contactin associated protein-like 3                                              | 42.4 |     |
| 70  | INPP5D    | inositol polyphosphate-5-phosphatase, 145kDa                                     | 42.4 |     |
| 71  | P2RY2     | purinergic receptor P2Y, G-protein coupled, 2                                    | 41.9 |     |
| 72  | HSPA4L    | heat shock 70kDa protein 4-like                                                  | 41.8 |     |
| 73  | AREG      | amphiregulin (schwannoma-derived growth factor)                                  | 41.7 |     |
| 74  | IGHG3     | immunoglobulin heavy constant gamma 3 (G3m marker)                               | 41.1 |     |
| 75  | IRF6      | interferon regulatory factor 6                                                   | 41.0 |     |
| 76  | SLC35E4   | solute carrier family 35, member E4                                              | 40.4 |     |
| 77  | SESN1     | sestrin 1                                                                        | 40.3 |     |
| 78  | COL27A1   | collagen, type XXVII, alpha 1                                                    | 40.0 |     |
| 79  | CABYR     | calcium binding tyrosine-(Y)-phosphorylation regulated (fibrousheathin 2)        | 39.8 |     |
| 80  | PLCXD2    | phosphatidylinositol-specific phospholipase C, X domain containing 2             | 39.7 | 2.6 |
| 81  | FAS       | Fas (TNF receptor superfamily, member 6)                                         | 39.7 |     |
| 82  | TAB3      | NA                                                                               | 39.4 | 2.1 |
| 83  | LRDD      | leucine-rich repeats and death domain containing                                 | 39.1 |     |
| 84  | PAG1      | phosphoprotein associated with glycosphingolipid microdomains 1                  | 38.6 | 3.1 |
| 85  | FLG       | filaggrin                                                                        | 38.1 | 6.4 |
| 86  | KBTBD8    | kelch repeat and BTB (POZ) domain containing 8                                   | 38.1 |     |
| 87  | EGR2      | early growth response 2 (Krox-20 homolog, Drosophila)                            | 37.9 |     |
| 88  | HBEGF     | heparin-binding EGF-like growth factor                                           | 37.5 |     |
| 89  | PDK1      | pyruvate dehydrogenase kinase, isozyme 1                                         | 36.7 | 2.9 |
| 90  | STS-1     | NA                                                                               | 36.2 |     |
| 91  | CEACAM1   | carcinoembryonic antigen-related cell adhesion molecule 1 (biliary glycoprotein) | 35.8 |     |
| 92  | KCTD12    | potassium channel tetramerisation domain containing 12                           | 35.7 |     |
| 93  | FDXR      | ferredoxin reductase                                                             | 35.7 |     |
| 94  | PPM1D     | protein phosphatase 1D magnesium-dependent, delta isoform                        | 35.5 |     |
| 95  | DUSP13    | dual specificity phosphatase 13                                                  | 35.4 |     |
| 96  | FAM46C    | family with sequence similarity 46, member C                                     | 35.1 |     |
| 97  | TNFRSF10A | tumor necrosis factor receptor superfamily, member 10a                           | 34.9 |     |
| 98  | LMCD1     | LIM and cysteine-rich domains 1                                                  | 34.8 |     |
| 99  | BMP2      | bone morphogenetic protein 2                                                     | 34.5 | 2.6 |
| 100 | SOX7      | SRY (sex determining region Y)-box 7                                             | 34.3 |     |

\* BE: fold-increase in primary bronchial epithelial cells (genes with > 2-fold increase)

**TABLE 3S - TOP 100 GENES UPREGULATED BY LOW TEMPERATURE IN CFBE410- CELLS**

| Gene symbol  | Description                                                                           | fold-increase |      |
|--------------|---------------------------------------------------------------------------------------|---------------|------|
|              |                                                                                       | CFBE410-      | BE * |
| 1 MYO10      | myosin X                                                                              | 411.6         | 18.8 |
| 2 ZBTB24     | zinc finger and BTB domain containing 24                                              | 83.5          | 16.7 |
| 3 EDG2       | endothelial differentiation, lysophosphatidic acid G-protein-coupled receptor, 2      | 73.0          |      |
| 4 ATXN1      | ataxin 1                                                                              | 67.5          | 6.7  |
| 5 EIF4G3     | eukaryotic translation initiation factor 4 gamma, 3                                   | 61.6          | 25.9 |
| 6 ETNK1      | ethanolamine kinase 1                                                                 | 55.1          |      |
| 7 C6orf114   | chromosome 6 open reading frame 114                                                   | 55.0          | 5.3  |
| 8 CNNM2      | cyclin M2                                                                             | 42.8          | 8.0  |
| 9 EPC1       | enhancer of polycomb homolog 1 (Drosophila)                                           | 40.3          |      |
| 10 IFNB1     | interferon, beta 1, fibroblast                                                        | 35.4          |      |
| 11 CDC42     | cell division cycle 42 (GTP binding protein, 25kDa)                                   | 35.3          |      |
| 12 PANK1     | pantothenate kinase 1                                                                 | 33.8          |      |
| 13 RHOBTB3   | Rho-related BTB domain containing 3                                                   | 33.2          | 11.1 |
| 14 BTG1      | B-cell translocation gene 1, anti-proliferative                                       | 32.9          |      |
| 15 HMGA2     | high mobility group AT-hook 2                                                         | 32.2          | 20.9 |
| 16 IL28A     | interleukin 28A (interferon, lambda 2)                                                | 30.3          |      |
| 17 IL28B     | interleukin 28B (interferon, lambda 3)                                                | 30.1          |      |
| 18 ABL2      | v-abl Abelson murine leukemia viral oncogene homolog 2 (arg, Abelson-related gene)    | 28.4          | 2.3  |
| 19 ZNF638    | zinc finger protein 638                                                               | 27.2          | 2.6  |
| 20 MGAT4A    | mannosyl (alpha-1,3-)-glycoprotein beta-1,4-N-acetylglucosaminyltransferase, isozyme  | 25.8          | 19.1 |
| 21 TPM3      | tropomyosin 3                                                                         | 25.5          | 5.4  |
| 22 PPARD     | peroxisome proliferative activated receptor, delta                                    | 24.9          |      |
| 23 BCL10     | B-cell CLL/lymphoma 10                                                                | 24.3          | 7.5  |
| 24 MNAB      | membrane associated DNA binding protein                                               | 23.8          |      |
| 25 H3F3B     | H3 histone, family 3B (H3.3B)                                                         | 23.3          | 5.9  |
| 26 ST7       | suppression of tumorigenicity 7                                                       | 22.6          |      |
| 27 CYP1A1    | cytochrome P450, family 1, subfamily A, polypeptide 1                                 | 21.6          |      |
| 28 EIF5A2    | eukaryotic translation initiation factor 5A2                                          | 20.6          | 4.1  |
| 29 IL29      | interleukin 29 (interferon, lambda 1)                                                 | 20.4          |      |
| 30 CUL1      | cullin 1                                                                              | 20.3          | 8.1  |
| 31 AMMECR1   | Alport syndrome, gene 1                                                               | 19.7          |      |
| 32 STK17B    | serine/threonine kinase 17b (apoptosis-inducing)                                      | 18.9          | 2.6  |
| 33 STARD13   | START domain containing 13                                                            | 18.6          |      |
| 34 GNAS      | GNAS complex locus                                                                    | 18.1          | 3.5  |
| 35 INA       | internexin neuronal intermediate filament protein, alpha                              | 18.1          |      |
| 36 FOSL1     | FOS-like antigen 1                                                                    | 18.0          |      |
| 37 PTHLH     | parathyroid hormone-like hormone                                                      | 17.9          |      |
| 38 USP15     | ubiquitin specific peptidase 15                                                       | 17.7          | 5.1  |
| 39 SP8       | Sp8 transcription factor                                                              | 17.6          | 4.5  |
| 40 ING3      | inhibitor of growth family, member 3                                                  | 16.9          | 4.9  |
| 41 ACTR3     | ARP3 actin-related protein 3 homolog (yeast)                                          | 16.9          |      |
| 42 C20orf155 | chromosome 20 open reading frame 155                                                  | 16.7          |      |
| 43 WIBG      | within bgcn homolog (Drosophila)                                                      | 16.7          | 6.3  |
| 44 C20orf67  | chromosome 20 open reading frame 67                                                   | 16.1          |      |
| 45 OAS3      | 2'-5'-oligoadenylate synthetase 3, 100kDa                                             | 15.8          | 4.0  |
| 46 INPP4B    | inositol polyphosphate-4-phosphatase, type II, 105kDa                                 | 15.8          | 5.2  |
| 47 DUSP5     | dual specificity phosphatase 5                                                        | 15.6          |      |
| 48 HIVEP1    | human immunodeficiency virus type I enhancer binding protein 1                        | 15.5          |      |
| 49 KLF4      | Kruppel-like factor 4 (gut)                                                           | 15.4          | 2.7  |
| 50 POLB      | polymerase (DNA directed), beta                                                       | 15.2          |      |
| 51 THBS1     | thrombospondin 1                                                                      | 15.2          | 5.2  |
| 52 EIF4G3    | eukaryotic translation initiation factor 4 gamma, 3                                   | 14.8          | 4.3  |
| 53 IFIH1     | interferon induced with helicase C domain 1                                           | 14.6          | 2.4  |
| 54 ELL2      | elongation factor, RNA polymerase II, 2                                               | 14.4          | 2.2  |
| 55 ARIH2     | ariadne homolog 2 (Drosophila)                                                        | 14.3          | 5.0  |
| 56 RUNX1     | c("runt-related transcription factor 1 (acute myeloid leukemia 1", " aml1 oncogene)") | 14.1          | 3.0  |
| 57 HERC3     | hect domain and RLD 3                                                                 | 14.1          | 13.5 |
| 58 OSMR      | oncostatin M receptor                                                                 | 14.0          | 3.2  |
| 59 DACT1     | dapper, antagonist of beta-catenin, homolog 1 (Xenopus laevis)                        | 13.8          |      |
| 60 PRO0149   | NA                                                                                    | 13.6          |      |
| 61 RNF103    | ring finger protein 103                                                               | 13.6          | 6.4  |
| 62 KRTAP2-1  | keratin associated protein 2-1                                                        | 13.6          |      |
| 63 C1orf116  | chromosome 1 open reading frame 116                                                   | 13.5          |      |
| 64 TMEM68    | transmembrane protein 68                                                              | 13.5          | 4.7  |
| 65 C10orf89  | chromosome 10 open reading frame 89                                                   | 13.1          |      |
| 66 GOLPH3    | golgi phosphoprotein 3 (coat-protein)                                                 | 12.9          |      |
| 67 SLC22A5   | solute carrier family 22 (organic cation transporter), member 5                       | 12.9          |      |

|     |          |                                                                                     |      |      |
|-----|----------|-------------------------------------------------------------------------------------|------|------|
| 68  | THRAP1   | thyroid hormone receptor associated protein 1                                       | 12.8 |      |
| 69  | NEDD4L   | neural precursor cell expressed, developmentally down-regulated 4-like              | 12.4 | 8.2  |
| 70  | MPHOSPH6 | M-phase phosphoprotein 6                                                            | 12.4 | 8.5  |
| 71  | SLC30A1  | solute carrier family 30 (zinc transporter), member 1                               | 12.3 | 2.7  |
| 72  | PSMD9    | proteasome (prosome, macropain) 26S subunit, non-ATPase, 9                          | 12.2 | 5.6  |
| 73  | LRRFIP2  | leucine rich repeat (in FLII) interacting protein 2                                 | 12.2 |      |
| 74  | KIAA0804 | KIAA0804                                                                            | 12.1 |      |
| 75  | LIMS3    | LIM and senescent cell antigen-like domains 3                                       | 12.0 | 3.4  |
| 76  | PTGS2    | prostaglandin-endoperoxide synthase 2 (prostaglandin G/H synthase and cyclooxygensa | 12.0 |      |
| 77  | PER2     | period homolog 2 (Drosophila)                                                       | 11.8 | 2.1  |
| 78  | PCDH7    | BH-protocadherin (brain-heart)                                                      | 11.8 | 3.2  |
| 79  | LATS2    | LATS, large tumor suppressor, homolog 2 (Drosophila)                                | 11.8 | 2.9  |
| 80  | KLHDC5   | kelch domain containing 5                                                           | 11.8 | 3.0  |
| 81  | CTGF     | connective tissue growth factor                                                     | 11.6 |      |
| 82  | SPHK1    | sphingosine kinase 1                                                                | 11.6 | 2.1  |
| 83  | PPP1R15A | protein phosphatase 1, regulatory (inhibitor) subunit 15A                           | 11.4 |      |
| 84  | MAX      | MYC associated factor X                                                             | 11.4 | 2.7  |
| 85  | CCDC50   | coiled-coil domain containing 50                                                    | 11.3 | 3.1  |
| 86  | ATF3     | activating transcription factor 3                                                   | 11.2 |      |
| 87  | DUSP6    | dual specificity phosphatase 6                                                      | 11.1 |      |
| 88  | MFSD2    | major facilitator superfamily domain containing 2                                   | 11.1 |      |
| 89  | NR4A2    | nuclear receptor subfamily 4, group A, member 2                                     | 11.0 |      |
| 90  | FAM105B  | family with sequence similarity 105, member B                                       | 11.0 | 4.1  |
| 91  | SPRY4    | sprouty homolog 4 (Drosophila)                                                      | 11.0 |      |
| 92  | MICALCL  | MICAL C-terminal like                                                               | 10.9 |      |
| 93  | CUL4A    | cullin 4A                                                                           | 10.7 | 12.3 |
| 94  | PCGF5    | polycomb group ring finger 5                                                        | 10.5 | 3.9  |
| 95  | PSMD11   | proteasome (prosome, macropain) 26S subunit, non-ATPase, 11                         | 10.2 | 4.8  |
| 96  | CELSR1   | cadherin, EGF LAG seven-pass G-type receptor 1 (flamingo homolog, Drosophila)       | 10.2 | 8.4  |
| 97  | AFG3L2   | AFG3 ATPase family gene 3-like 2 (yeast)                                            | 10.1 |      |
| 98  | SP3      | Sp3 transcription factor                                                            | 10.1 | 3.0  |
| 99  | LARP2    | La ribonucleoprotein domain family, member 2                                        | 10.1 | 6.3  |
| 100 | USP36    | ubiquitin specific peptidase 36                                                     | 10.0 | 2.4  |

\* BE: fold-increase in primary bronchial epithelial cells (genes with > 2-fold increase)

**TABLE 4S - TOP 100 GENES UPREGULATED BY CORR-4a IN CFBE41o- CELLS**

| Gene symbol  | Description                                                                           | fold-increase |      |
|--------------|---------------------------------------------------------------------------------------|---------------|------|
|              |                                                                                       | CFBE41o-      | BE * |
| 1 DUSP5      | dual specificity phosphatase 5                                                        | 8.2           |      |
| 2 HSPA6      | heat shock 70kDa protein 6 (HSP70B')                                                  | 7.6           | 2.2  |
| 3 DUSP6      | dual specificity phosphatase 6                                                        | 6.5           |      |
| 4 COL8A1     | collagen, type VIII, alpha 1                                                          | 6.3           |      |
| 5 MALAT1     | metastasis associated lung adenocarcinoma transcript 1 (non-coding RNA)               | 5.8           |      |
| 6 TNFRSF11B  | tumor necrosis factor receptor superfamily, member 11b (osteoprotegerin)              | 5.4           |      |
| 7 PAPPA      | pregnancy-associated plasma protein A, pappalysin 1                                   | 5.3           |      |
| 8 PTGS2      | prostaglandin-endoperoxide synthase 2 (prostaglandin G/H synthase and cyclooxygenase) | 5.3           |      |
| 9 CLIC5      | chloride intracellular channel 5                                                      | 5.2           |      |
| 10 NEDD4L    | neural precursor cell expressed, developmentally down-regulated 4-like                | 4.8           |      |
| 11 HDAC9     | histone deacetylase 9                                                                 | 4.5           |      |
| 12 ADAMTS9   | ADAM metalloproteinase with thrombospondin type 1 motif, 9                            | 4.3           |      |
| 13 PLAT      | plasminogen activator, tissue                                                         | 4.3           |      |
| 14 HBEGF     | heparin-binding EGF-like growth factor                                                | 4.3           |      |
| 15 FOSL1     | FOS-like antigen 1                                                                    | 4.3           |      |
| 16 ADRB2     | adrenergic, beta-2-, receptor, surface                                                | 4.2           |      |
| 17 FAM107B   | family with sequence similarity 107, member B                                         | 4.1           |      |
| 18 SLC04A1   | solute carrier organic anion transporter family, member 4A1                           | 4.0           |      |
| 19 CDH4      | cadherin 4, type 1, R-cadherin (retinal)                                              | 4.0           |      |
| 20 DUSP7     | dual specificity phosphatase 7                                                        | 4.0           |      |
| 21 CUGBP2    | CUG triplet repeat, RNA binding protein 2                                             | 3.9           |      |
| 22 PTX3      | pentraxin-related gene, rapidly induced by IL-1 beta                                  | 3.9           |      |
| 23 GOLT1A    | golgi transport 1 homolog A (S. cerevisiae)                                           | 3.8           |      |
| 24 PRR6      | proline rich 6                                                                        | 3.8           |      |
| 25 SLC7A11   | solute carrier family 7, (cationic amino acid transporter, y+ system) member 11       | 3.8           |      |
| 26 TMEM45A   | transmembrane protein 45A                                                             | 3.8           |      |
| 27 HIST1H4H  | histone 1, H4h                                                                        | 3.8           |      |
| 28 POLR1B    | polymerase (RNA) I polypeptide B, 128kDa                                              | 3.8           |      |
| 29 MYEOV     | c("myeloma overexpressed gene (in a subset of t(11", "14) positive multiple myelomas) | 3.8           |      |
| 30 VEZT      | vezatin, adherens junctions transmembrane protein                                     | 3.7           |      |
| 31 SLC7A1    | solute carrier family 7 (cationic amino acid transporter, y+ system), member 1        | 3.7           |      |
| 32 PPP1R9A   | protein phosphatase 1, regulatory (inhibitor) subunit 9A                              | 3.7           |      |
| 33 GRHL1     | grainyhead-like 1 (Drosophila)                                                        | 3.7           |      |
| 34 ASNS      | asparagine synthetase                                                                 | 3.6           |      |
| 35 TSPAN5    | tetraspanin 5                                                                         | 3.6           |      |
| 36 WT1       | Wilms tumor 1                                                                         | 3.6           |      |
| 37 CXCL5     | chemokine (C-X-C motif) ligand 5                                                      | 3.6           | 2.7  |
| 38 CREM      | cAMP responsive element modulator                                                     | 3.5           |      |
| 39 C6orf155  | chromosome 6 open reading frame 155                                                   | 3.4           |      |
| 40 COL13A1   | collagen, type XIII, alpha 1                                                          | 3.4           |      |
| 41 IL24      | interleukin 24                                                                        | 3.4           |      |
| 42 ABCC3     | ATP-binding cassette, sub-family C (CFTR/MRP), member 3                               | 3.4           |      |
| 43 TLR4      | toll-like receptor 4                                                                  | 3.4           |      |
| 44 STYK1     | serine/threonine/tyrosine kinase 1                                                    | 3.4           |      |
| 45 ARHGAP18  | Rho GTPase activating protein 18                                                      | 3.4           |      |
| 46 SPRY4     | sprouty homolog 4 (Drosophila)                                                        | 3.4           |      |
| 47 MYC       | v-myc myelocytomatosis viral oncogene homolog (avian)                                 | 3.3           |      |
| 48 HIST1H2BD | histone 1, H2bd                                                                       | 3.3           |      |
| 49 ITGB5     | integrin, beta 5                                                                      | 3.3           |      |
| 50 HS3ST1    | heparan sulfate (glucosamine) 3-O-sulfotransferase 1                                  | 3.2           |      |
| 51 FST       | follistatin                                                                           | 3.2           |      |
| 52 C1orf24   | chromosome 1 open reading frame 24                                                    | 3.2           |      |
| 53 ANKRD1    | ankyrin repeat domain 1 (cardiac muscle)                                              | 3.2           |      |
| 54 C1orf116  | chromosome 1 open reading frame 116                                                   | 3.2           |      |
| 55 TMEM16A   | transmembrane protein 16A                                                             | 3.2           |      |
| 56 EIF5A2    | eukaryotic translation initiation factor 5A2                                          | 3.2           |      |
| 57 MALL      | mal, T-cell differentiation protein-like                                              | 3.2           |      |
| 58 BICD2     | bicaudal D homolog 2 (Drosophila)                                                     | 3.1           |      |
| 59 WHSC1     | Wolf-Hirschhorn syndrome candidate 1                                                  | 3.1           |      |
| 60 STAMBPL1  | STAM binding protein-like 1                                                           | 3.1           |      |
| 61 TGFA      | transforming growth factor, alpha                                                     | 3.1           |      |
| 62 KIAA1826  | KIAA1826                                                                              | 3.1           |      |
| 63 PHLDA1    | pleckstrin homology-like domain, family A, member 1                                   | 3.1           |      |
| 64 PI3       | peptidase inhibitor 3, skin-derived (SKALP)                                           | 3.1           |      |
| 65 CCND2     | cyclin D2                                                                             | 3.0           |      |
| 66 STC1      | stanniocalcin 1                                                                       | 3.0           |      |
| 67 C12orf24  | chromosome 12 open reading frame 24                                                   | 3.0           |      |

|     |          |                                                                                         |     |
|-----|----------|-----------------------------------------------------------------------------------------|-----|
| 68  | MCM3AP   | MCM3 minichromosome maintenance deficient 3 ( <i>S. cerevisiae</i> ) associated protein | 3.0 |
| 69  | RUNX2    | runt-related transcription factor 2                                                     | 3.0 |
| 70  | STC2     | stanniocalcin 2                                                                         | 3.0 |
| 71  | GPR160   | G protein-coupled receptor 160                                                          | 3.0 |
| 72  | NT5E     | 5'-nucleotidase, ecto (CD73)                                                            | 3.0 |
| 73  | FAIM3    | Fas apoptotic inhibitory molecule 3                                                     | 3.0 |
| 74  | BOP1     | block of proliferation 1                                                                | 3.0 |
| 75  | FOXA1    | forkhead box A1                                                                         | 3.0 |
| 76  | MTHFD2L  | methylenetetrahydrofolate dehydrogenase (NADP+ dependent) 2-like                        | 2.9 |
| 77  | ACPL2    | acid phosphatase-like 2                                                                 | 2.9 |
| 78  | HINT3    | histidine triad nucleotide binding protein 3                                            | 2.9 |
| 79  | C3orf58  | chromosome 3 open reading frame 58                                                      | 2.9 |
| 80  | KIAA0368 | KIAA0368                                                                                | 2.9 |
| 81  | ETV5     | ets variant gene 5 (ets-related molecule)                                               | 2.9 |
| 82  | IL1R2    | interleukin 1 receptor, type II                                                         | 2.9 |
| 83  | ANKH     | ankylosis, progressive homolog (mouse)                                                  | 2.9 |
| 84  | GABBR2   | gamma-aminobutyric acid (GABA) B receptor, 2                                            | 2.9 |
| 85  | SLC43A3  | solute carrier family 43, member 3                                                      | 2.9 |
| 86  | LPIN1    | lipin 1                                                                                 | 2.9 |
| 87  | PLAGL1   | pleiomorphic adenoma gene-like 1                                                        | 2.8 |
| 88  | PDCD1LG2 | programmed cell death 1 ligand 2                                                        | 2.8 |
| 89  | CKB      | creatine kinase, brain                                                                  | 2.8 |
| 90  | VEGF     | vascular endothelial growth factor                                                      | 2.8 |
| 91  | RAB3B    | RAB3B, member RAS oncogene family                                                       | 2.8 |
| 92  | FRMD4A   | FERM domain containing 4A                                                               | 2.8 |
| 93  | ELOVL6   | ELOVL family member 6, elongation of long chain fatty acids (FEN1/Elo2, SUR4/Elo3-lik   | 2.8 |
| 94  | CD44     | CD44 antigen (Indian blood group)                                                       | 2.8 |
| 95  | ZBED2    | zinc finger, BED-type containing 2                                                      | 2.8 |
| 96  | GALNT14  | UDP-N-acetyl-alpha-D-galactosamine:polypeptide N-acetylgalactosaminyltransferase 14     | 2.8 |
| 97  | ANAPC7   | anaphase promoting complex subunit 7                                                    | 2.8 |
| 98  | CCDC22   | coiled-coil domain containing 22                                                        | 2.8 |
| 99  | SPHK1    | sphingosine kinase 1                                                                    | 2.8 |
| 100 | EREG     | epiregulin                                                                              | 2.8 |

\* BE: fold-increase in primary bronchial epithelial cells (genes with > 2-fold increase)



**TABLE 5S - MOST DOWNREGULATED GENES BY 9-AMINAOACRIDINE IN CFBE41o- CELLS**

| Gene symbol | Description                                                                 | fold-change |      |
|-------------|-----------------------------------------------------------------------------|-------------|------|
|             |                                                                             | CFBE41o-    | BE * |
| 1 SLC2A10   | solute carrier family 2 (facilitated glucose transporter), member 10        | 0.02        |      |
| 2 ANXA8     | annexin A8                                                                  | 0.02        |      |
| 3 CDCA7     | cell division cycle associated 7                                            | 0.02        |      |
| 4 PYCARD    | PYD and CARD domain containing                                              | 0.02        | 0.42 |
| 5 TIA1      | TIA1 cytotoxic granule-associated RNA binding protein                       | 0.02        |      |
| 6 EXOC2     | exocyst complex component 2                                                 | 0.02        |      |
| 7 TRIM14    | tripartite motif-containing 14                                              | 0.02        |      |
| 8 SP110     | SP110 nuclear body protein                                                  | 0.03        |      |
| 9 SFXN1     | sideroflexin 1                                                              | 0.03        | 0.49 |
| 10 CSTF3    | cleavage stimulation factor, 3' pre-RNA, subunit 3, 77kDa                   | 0.03        |      |
| 11 MYO5C    | myosin VC                                                                   | 0.03        |      |
| 12 ZNF512   | zinc finger protein 512                                                     | 0.03        | 0.50 |
| 13 HNRPDL   | heterogeneous nuclear ribonucleoprotein D-like                              | 0.03        |      |
| 14 SP100    | SP100 nuclear antigen                                                       | 0.03        |      |
| 15 AGGF1    | angiogenic factor with G patch and FHA domains 1                            | 0.03        |      |
| 16 DDX46    | DEAD (Asp-Glu-Ala-Asp) box polypeptide 46                                   | 0.03        |      |
| 17 COMMD2   | COMM domain containing 2                                                    | 0.03        |      |
| 18 AP3S2    | adaptor-related protein complex 3, sigma 2 subunit                          | 0.03        |      |
| 19 C1orf144 | chromosome 1 open reading frame 144                                         | 0.04        |      |
| 20 PTPLAD2  | protein tyrosine phosphatase-like A domain containing 2                     | 0.04        | 0.28 |
| 21 VPS72    | vacuolar protein sorting 72 (yeast)                                         | 0.04        |      |
| 22 SAR1B    | SAR1 gene homolog B (S. cerevisiae)                                         | 0.04        |      |
| 23 GPR110   | G protein-coupled receptor 110                                              | 0.04        |      |
| 24 SLC25A37 | solute carrier family 25, member 37                                         | 0.04        |      |
| 25 ICMT     | isoprenylcysteine carboxyl methyltransferase                                | 0.04        |      |
| 26 HIP2     | huntingtin interacting protein 2                                            | 0.04        |      |
| 27 SRI      | sorcin                                                                      | 0.04        | 0.50 |
| 28 FN1      | fibronectin 1                                                               | 0.04        | 0.48 |
| 29 GSTO2    | glutathione S-transferase omega 2                                           | 0.04        | 0.31 |
| 30 C1orf19  | chromosome 1 open reading frame 19                                          | 0.04        |      |
| 31 NR6A1    | nuclear receptor subfamily 6, group A, member 1                             | 0.04        |      |
| 32 ORC5L    | origin recognition complex, subunit 5-like (yeast)                          | 0.04        |      |
| 33 BHLHB2   | basic helix-loop-helix domain containing, class B, 2                        | 0.04        |      |
| 34 DPH5     | DPH5 homolog (S. cerevisiae)                                                | 0.04        | 0.39 |
| 35 MKL2     | MKL/myocardin-like 2                                                        | 0.04        |      |
| 36 KIAA0974 | KIAA0974                                                                    | 0.04        |      |
| 37 SPTLC2   | serine palmitoyltransferase, long chain base subunit 2                      | 0.04        | 0.48 |
| 38 GRAMD3   | GRAM domain containing 3                                                    | 0.04        | 0.33 |
| 39 GBP3     | guanylate binding protein 3                                                 | 0.04        |      |
| 40 BBS2     | Bardet-Biedl syndrome 2                                                     | 0.04        |      |
| 41 VGLL1    | vestigial like 1 (Drosophila)                                               | 0.04        |      |
| 42 SAAL1    | serum amyloid A-like 1                                                      | 0.04        | 0.37 |
| 43 NECAP1   | NECAP endocytosis associated 1                                              | 0.04        |      |
| 44 PAFAH1B1 | platelet-activating factor acetylhydrolase, isoform Ib, alpha subunit 45kDa | 0.04        |      |
| 45 NPEPPS   | aminopeptidase puromycin sensitive                                          | 0.04        |      |
| 46 LSM6     | LSM6 homolog, U6 small nuclear RNA associated (S. cerevisiae)               | 0.04        |      |
| 47 MULK     | multiple substrate lipid kinase                                             | 0.05        |      |
| 48 MPHOSPH9 | M-phase phosphoprotein 9                                                    | 0.05        | 0.46 |
| 49 MBTPS2   | membrane-bound transcription factor peptidase, site 2                       | 0.05        |      |
| 50 NMI      | N-myc (and STAT) interactor                                                 | 0.05        |      |
| 51 SCCPDH   | saccharopine dehydrogenase (putative)                                       | 0.05        |      |
| 52 CCL28    | chemokine (C-C motif) ligand 28                                             | 0.05        | 0.49 |
| 53 TRIM16   | tripartite motif-containing 16                                              | 0.05        |      |
| 54 CXorf39  | chromosome X open reading frame 39                                          | 0.05        |      |
| 55 ZNF22    | zinc finger protein 22 (KOX 15)                                             | 0.05        | 0.44 |
| 56 BAZ2A    | brimodomain adjacent to zinc finger domain, 2A                              | 0.05        |      |
| 57 EPRS     | glutamyl-prolyl-tRNA synthetase                                             | 0.05        | 0.27 |
| 58 TNRC5    | trinucleotide repeat containing 5                                           | 0.05        |      |
| 59 MTCH2    | mitochondrial carrier homolog 2 (C. elegans)                                | 0.05        |      |
| 60 NEDD9    | neural precursor cell expressed, developmentally down-regulated 9           | 0.05        |      |
| 61 FCMD     | Fukuyama type congenital muscular dystrophy (fukutin)                       | 0.05        |      |
| 62 C8orf55  | chromosome 8 open reading frame 55                                          | 0.05        |      |
| 63 ZYG11B   | zyg-11 homolog B (C. elegans)                                               | 0.05        | 0.37 |
| 64 TBC1D2B  | TBC1 domain family, member 2B                                               | 0.05        |      |
| 65 IFI44    | interferon-induced protein 44                                               | 0.05        | 0.38 |
| 66 BTN3A3   | butyrophilin, subfamily 3, member A3                                        | 0.05        |      |
| 67 PARP12   | poly (ADP-ribose) polymerase family, member 12                              | 0.05        |      |

|     |          |                                                                                      |      |      |
|-----|----------|--------------------------------------------------------------------------------------|------|------|
| 68  | NCOA5    | nuclear receptor coactivator 5                                                       | 0.05 |      |
| 69  | C6orf108 | chromosome 6 open reading frame 108                                                  | 0.05 |      |
| 70  | SAMD9L   | sterile alpha motif domain containing 9-like                                         | 0.05 |      |
| 71  | RNF141   | ring finger protein 141                                                              | 0.05 |      |
| 72  | PDZK1IP1 | PDZK1 interacting protein 1                                                          | 0.05 |      |
| 73  | STRN     | striatin, calmodulin binding protein                                                 | 0.05 |      |
| 74  | KCTD18   | potassium channel tetramerisation domain containing 18                               | 0.05 |      |
| 75  | SFRS4    | splicing factor, arginine/serine-rich 4                                              | 0.05 |      |
| 76  | THUMPD3  | THUMP domain containing 3                                                            | 0.06 |      |
| 77  | OAS1     | 2',5'-oligoadenylate synthetase 1, 40/46kDa                                          | 0.06 |      |
| 78  | HNRPD    | heterogeneous nuclear ribonucleoprotein D (AU-rich element RNA binding protein 1, 37 | 0.06 |      |
| 79  | CRTAP    | cartilage associated protein                                                         | 0.06 | 0.35 |
| 80  | SLC30A9  | solute carrier family 30 (zinc transporter), member 9                                | 0.06 |      |
| 81  | ARL4C    | ADP-ribosylation factor-like 4C                                                      | 0.06 |      |
| 82  | CD58     | CD58 antigen, (lymphocyte function-associated antigen 3)                             | 0.06 |      |
| 83  | DDX19A   | DEAD (Asp-Glu-Ala-As) box polypeptide 19A                                            | 0.06 |      |
| 84  | CUTC     | cutC copper transporter homolog (E. coli)                                            | 0.06 |      |
| 85  | TMBIM4   | transmembrane BAX inhibitor motif containing 4                                       | 0.06 | 0.49 |
| 86  | BCAT1    | branched chain aminotransferase 1, cytosolic                                         | 0.06 |      |
| 87  | CST6     | cystatin E/M                                                                         | 0.06 |      |
| 88  | CDC91L1  | CDC91 cell division cycle 91-like 1 (S. cerevisiae)                                  | 0.06 |      |
| 89  | CD47     | CD47 antigen (Rh-related antigen, integrin-associated signal transducer)             | 0.06 |      |
| 90  | RFP      | ret finger protein                                                                   | 0.06 |      |
| 91  | DOCK5    | dedicator of cytokinesis 5                                                           | 0.06 |      |
| 92  | C1orf112 | chromosome 1 open reading frame 112                                                  | 0.06 |      |
| 93  | YTHDC2   | YTH domain containing 2                                                              | 0.06 | 0.44 |
| 94  | CRBN     | cereblon                                                                             | 0.06 |      |
| 95  | DPP8     | dipeptidyl-peptidase 8                                                               | 0.06 |      |
| 96  | PIGB     | phosphatidylinositol glycan, class B                                                 | 0.06 | 0.32 |
| 97  | MOBK12B  | MOB1, Mps One Binder kinase activator-like 2B (yeast)                                | 0.06 |      |
| 98  | C16orf44 | chromosome 16 open reading frame 44                                                  | 0.06 |      |
| 99  | ORC3L    | origin recognition complex, subunit 3-like (yeast)                                   | 0.06 |      |
| 100 | RABIF    | RAB interacting factor                                                               | 0.06 |      |

\* BE: fold-change in primary bronchial epithelial cells (genes with > 2-fold decrease)

**TABLE 6S - MOST DOWNREGULATED GENES BY CICLOPIROX IN CFBE41o- CELLS**

| Gene symbol  | Description                                                                           | fold-change |      |
|--------------|---------------------------------------------------------------------------------------|-------------|------|
|              |                                                                                       | CFBE41o-    | BE * |
| 1 CYP1B1     | cytochrome P450, family 1, subfamily B, polypeptide 1                                 | 0.02        |      |
| 2 IGFBP5     | insulin-like growth factor binding protein 5                                          | 0.02        |      |
| 3 BCAT1      | branched chain aminotransferase 1, cytosolic                                          | 0.04        |      |
| 4 KLK6       | kallikrein 6 (neurosin, zyme)                                                         | 0.04        |      |
| 5 FZD2       | frizzled homolog 2 (Drosophila)                                                       | 0.05        | 0.44 |
| 6 PPAP2C     | phosphatidic acid phosphatase type 2C                                                 | 0.05        | 0.5  |
| 7 GPR110     | G protein-coupled receptor 110                                                        | 0.05        |      |
| 8 KYNU       | kynureninase (L-kynurenine hydrolase)                                                 | 0.05        |      |
| 9 GRHL2      | grainyhead-like 2 (Drosophila)                                                        | 0.06        |      |
| 10 HIST1H2AC | histone 1, H2ac                                                                       | 0.06        |      |
| 11 ANKRD38   | ankyrin repeat domain 38                                                              | 0.06        |      |
| 12 PCDH5     | protocadherin beta 5                                                                  | 0.06        |      |
| 13 SORBS2    | sorbin and SH3 domain containing 2                                                    | 0.06        |      |
| 14 KMO       | kynurenine 3-monooxygenase (kynurenine 3-hydroxylase)                                 | 0.06        |      |
| 15 NS4ATP2   | NA                                                                                    | 0.06        |      |
| 16 PRTFDC1   | phosphoribosyl transferase domain containing 1                                        | 0.07        | 0.26 |
| 17 HIST1H2BD | histone 1, H2bd                                                                       | 0.07        |      |
| 18 RALGPS2   | Ral GEF with PH domain and SH3 binding motif 2                                        | 0.07        |      |
| 19 STEAP4    | STEAP family member 4                                                                 | 0.07        |      |
| 20 TMTC4     | transmembrane and tetratricopeptide repeat containing 4                               | 0.07        |      |
| 21 RHOBTB3   | Rho-related BTB domain containing 3                                                   | 0.08        |      |
| 22 VTCN1     | V-set domain containing T cell activation inhibitor 1                                 | 0.08        | 0.48 |
| 23 HIST1H3H  | histone 1, H3h                                                                        | 0.08        |      |
| 24 TRIM16    | tripartite motif-containing 16                                                        | 0.08        |      |
| 25 GULP1     | GULP, engulfment adaptor PTB domain containing 1                                      | 0.08        |      |
| 26 HYL1      | hydrolethalus syndrome 1                                                              | 0.08        |      |
| 27 CCNB1     | cyclin B1                                                                             | 0.08        | 0.3  |
| 28 OSGEPL1   | O-sialoglycoprotein endopeptidase-like 1                                              | 0.08        |      |
| 29 WNT5A     | wingless-type MMTV integration site family, member 5A                                 | 0.08        |      |
| 30 PSRC1     | proline/serine-rich coiled-coil 1                                                     | 0.08        | 0.48 |
| 31 SAMD9L    | sterile alpha motif domain containing 9-like                                          | 0.09        |      |
| 32 TRIM4     | tripartite motif-containing 4                                                         | 0.09        |      |
| 33 TIA1      | TIA1 cytotoxic granule-associated RNA binding protein                                 | 0.09        |      |
| 34 JPH2      | junctophilin 2                                                                        | 0.09        |      |
| 35 FRAS1     | Fraser syndrome 1                                                                     | 0.09        | 0.46 |
| 36 MGAT4A    | mannosyl (alpha-1,3-)-glycoprotein beta-1,4-N-acetylglucosaminyltransferase, isozyme  | 0.09        |      |
| 37 EPST11    | epithelial stromal interaction 1 (breast)                                             | 0.09        | 0.44 |
| 38 PBX1      | pre-B-cell leukemia transcription factor 1                                            | 0.10        | 0.49 |
| 39 ACOT4     | acyl-CoA thioesterase 4                                                               | 0.10        |      |
| 40 HIST2H2BE | histone 2, H2be                                                                       | 0.10        |      |
| 41 HIST1H2BF | histone 1, H2bf                                                                       | 0.10        |      |
| 42 RTN4IP1   | reticulon 4 interacting protein 1                                                     | 0.10        |      |
| 43 HIST1H2BH | histone 1, H2bh                                                                       | 0.10        |      |
| 44 KLK10     | kallikrein 10                                                                         | 0.10        |      |
| 45 MAML2     | mastermind-like 2 (Drosophila)                                                        | 0.10        |      |
| 46 PGRMC2    | progesterone receptor membrane component 2                                            | 0.10        |      |
| 47 PHF23     | PHD finger protein 23                                                                 | 0.10        |      |
| 48 BMF       | Bcl2 modifying factor                                                                 | 0.10        |      |
| 49 C1QTNF6   | C1q and tumor necrosis factor related protein 6                                       | 0.10        |      |
| 50 BTN3A3    | butyrophilin, subfamily 3, member A3                                                  | 0.11        | 0.46 |
| 51 ALDH6A1   | aldehyde dehydrogenase 6 family, member A1                                            | 0.11        |      |
| 52 ELOVL6    | ELOVL family member 6, elongation of long chain fatty acids (FEN1/Elo2, SUR4/Elo3-lik | 0.11        |      |
| 53 MAN2C1    | mannosidase, alpha, class 2C, member 1                                                | 0.11        |      |
| 54 ARL6IP5   | ADP-ribosylation-like factor 6 interacting protein 5                                  | 0.11        |      |
| 55 C8orf4    | chromosome 8 open reading frame 4                                                     | 0.11        |      |
| 56 TRIM6     | tripartite motif-containing 6                                                         | 0.11        |      |
| 57 MPHOSPH9  | M-phase phosphoprotein 9                                                              | 0.12        |      |
| 58 C9orf3    | chromosome 9 open reading frame 3                                                     | 0.12        |      |
| 59 BTN3A2    | butyrophilin, subfamily 3, member A2                                                  | 0.12        |      |
| 60 TMPO      | thymopoietin                                                                          | 0.12        |      |
| 61 AHA2      | AHA1, activator of heat shock 90kDa protein ATPase homolog 2 (yeast)                  | 0.12        |      |
| 62 ANPEP     | alanyl (membrane) aminopeptidase (aminopeptidase N, aminopeptidase M, microsomal      | 0.12        |      |
| 63 DEPDC1    | DEP domain containing 1                                                               | 0.12        | 0.31 |
| 64 TAF9B     | TAF9B RNA polymerase II, TATA box binding protein (TBP)-associated factor, 31kDa      | 0.12        | 0.37 |
| 65 GALNT6    | UDP-N-acetyl-alpha-D-galactosamine:polypeptide N-acetylgalactosaminyltransferase 6    | 0.12        |      |
| 66 B3GALT4   | UDP-Gal:betaGlcNAc beta 1,3-galactosyltransferase, polypeptide 4                      | 0.12        |      |
| 67 MXRA5     | matrix-remodelling associated 5                                                       | 0.12        |      |

|     |           |                                                                              |      |      |
|-----|-----------|------------------------------------------------------------------------------|------|------|
| 68  | C14orf93  | chromosome 14 open reading frame 93                                          | 0.12 |      |
| 69  | RARRES3   | retinoic acid receptor responder (tazarotene induced) 3                      | 0.13 |      |
| 70  | LTB       | lymphotoxin beta (TNF superfamily, member 3)                                 | 0.13 |      |
| 71  | LEPR      | leptin receptor                                                              | 0.13 |      |
| 72  | TEF       | thyrotrophic embryonic factor                                                | 0.13 |      |
| 73  | H2BFS     | H2B histone family, member S                                                 | 0.13 |      |
| 74  | VANGL1    | vang-like 1 (van gogh, Drosophila)                                           | 0.13 |      |
| 75  | TRERF1    | transcriptional regulating factor 1                                          | 0.13 |      |
| 76  | FIGN      | fidgetin                                                                     | 0.13 |      |
| 77  | HOXA9     | homeobox A9                                                                  | 0.14 |      |
| 78  | ATG4C     | ATG4 autophagy related 4 homolog C ( <i>S. cerevisiae</i> )                  | 0.14 |      |
| 79  | DNAJC15   | DnaJ (Hsp40) homolog, subfamily C, member 15                                 | 0.14 | 0.46 |
| 80  | HTATIP2   | HIV-1 Tat interactive protein 2, 30kDa                                       | 0.14 |      |
| 81  | MAL       | mal, T-cell differentiation protein                                          | 0.14 |      |
| 82  | DHRS1     | dehydrogenase/reductase (SDR family) member 1                                | 0.14 | 0.44 |
| 83  | NAPE-PLD  | NA                                                                           | 0.14 |      |
| 84  | POLE2     | polymerase (DNA directed), epsilon 2 (p59 subunit)                           | 0.14 |      |
| 85  | TAP1      | transporter 1, ATP-binding cassette, sub-family B (MDR/TAP)                  | 0.14 |      |
| 86  | HIST1H2BG | histone 1, H2bg                                                              | 0.15 |      |
| 87  | PLEKHH2   | pleckstrin homology domain containing, family H (with MyTH4 domain) member 2 | 0.15 | 0.45 |
| 88  | HIST1H2BE | histone 1, H2be                                                              | 0.15 |      |
| 89  | OPN3      | opsin 3 (encephalopsin, panopsin)                                            | 0.15 |      |
| 90  | TNFAIP8L1 | tumor necrosis factor, alpha-induced protein 8-like 1                        | 0.15 |      |
| 91  | SLITRK6   | SLIT and NTRK-like family, member 6                                          | 0.15 |      |
| 92  | SUMO3     | SMT3 suppressor of mif two 3 homolog 3 (yeast)                               | 0.15 |      |
| 93  | ANTXR1    | anthrax toxin receptor 1                                                     | 0.15 | 0.33 |
| 94  | ABCC3     | ATP-binding cassette, sub-family C (CFTR/MRP), member 3                      | 0.15 |      |
| 95  | MARCKS    | myristoylated alanine-rich protein kinase C substrate                        | 0.15 |      |
| 96  | VGCNL1    | voltage gated channel like 1                                                 | 0.15 |      |
| 97  | TNS3      | tensin 3                                                                     | 0.15 |      |
| 98  | ZNF302    | zinc finger protein 302                                                      | 0.15 |      |
| 99  | CBR4      | NA                                                                           | 0.15 |      |
| 100 | HIST2H2AA | histone 2, H2aa                                                              | 0.15 |      |

\* BE: fold-change in primary bronchial epithelial cells (genes with > 2-fold decrease)

**TABLE 7S - MOST DOWNREGULATED GENES BY LOW TEMPERATURE IN CFBE41o- CELLS**

| Gene symbol  | Description                                                                             | fold-change |      |
|--------------|-----------------------------------------------------------------------------------------|-------------|------|
|              |                                                                                         | CFBE41o-    | BE * |
| 1 SLC39A10   | solute carrier family 39 (zinc transporter), member 10                                  | 0.03        |      |
| 2 RAD54B     | RAD54 homolog B (S. cerevisiae)                                                         | 0.04        | 0.28 |
| 3 C14orf125  | chromosome 14 open reading frame 125                                                    | 0.05        |      |
| 4 MGAT4A     | mannosyl (alpha-1,3-)-glycoprotein beta-1,4-N-acetylglucosaminyltransferase, isozyme    | 0.05        | 0.50 |
| 5 CDKN2B     | cyclin-dependent kinase inhibitor 2B (p15, inhibits CDK4)                               | 0.05        | 0.27 |
| 6 STARD13    | START domain containing 13                                                              | 0.05        |      |
| 7 HERC4      | hect domain and RLD 4                                                                   | 0.06        | 0.08 |
| 8 OBFC2A     | oligonucleotide/oligosaccharide-binding fold containing 2A                              | 0.06        | 0.21 |
| 9 FANCL      | Fanconi anemia, complementation group L                                                 | 0.07        | 0.28 |
| 10 NAPE-PLD  | NA                                                                                      | 0.07        |      |
| 11 PCMTD1    | protein-L-isoaspartate (D-aspartate) O-methyltransferase domain containing 1            | 0.07        | 0.19 |
| 12 PMS1      | PMS1 postmeiotic segregation increased 1 (S. cerevisiae)                                | 0.07        | 0.30 |
| 13 ZKSCAN1   | zinc finger with KRAB and SCAN domains 1                                                | 0.07        | 0.17 |
| 14 SMEK2     | NA                                                                                      | 0.08        | 0.06 |
| 15 FAM69A    | family with sequence similarity 69, member A                                            | 0.08        |      |
| 16 RBM4B     | RNA binding motif protein 4B                                                            | 0.08        | 0.25 |
| 17 LYST      | lysosomal trafficking regulator                                                         | 0.08        | 0.13 |
| 18 KMO       | kynurenine 3-monooxygenase (kynurenine 3-hydroxylase)                                   | 0.08        |      |
| 19 PLEKHA8   | pleckstrin homology domain containing, family A (phosphoinositide binding specific) m   | 0.08        | 0.38 |
| 20 DCUN1D4   | DCN1, defective in cullin neddylation 1, domain containing 4 (S. cerevisiae)            | 0.08        | 0.22 |
| 21 TXNDC5    | thioredoxin domain containing 5                                                         | 0.08        |      |
| 22 C17orf80  | chromosome 17 open reading frame 80                                                     | 0.09        | 0.23 |
| 23 ENO2      | enolase 2 (gamma, neuronal)                                                             | 0.09        | 0.22 |
| 24 EYA3      | eyes absent homolog 3 (Drosophila)                                                      | 0.09        | 0.39 |
| 25 C11orf54  | chromosome 11 open reading frame 54                                                     | 0.09        | 0.17 |
| 26 FAM36A    | family with sequence similarity 36, member A                                            | 0.09        | 0.45 |
| 27 THRB      | thyroid hormone receptor, beta (erythroblastic leukemia viral (v-erb-a) oncogene homc   | 0.09        |      |
| 28 FLJ13305  | NA                                                                                      | 0.09        |      |
| 29 C1orf25   | chromosome 1 open reading frame 25                                                      | 0.09        | 0.09 |
| 30 MOSPD2    | motile sperm domain containing 2                                                        | 0.10        | 0.18 |
| 31 SYTL4     | synaptotagmin-like 4 (granuphilin-a)                                                    | 0.10        | 0.25 |
| 32 TRNT1     | tRNA nucleotidyl transferase, CCA-adding, 1                                             | 0.10        | 0.24 |
| 33 FSHPRH1   | FSH primary response (LRPR1 homolog, rat) 1                                             | 0.10        |      |
| 34 C9orf40   | chromosome 9 open reading frame 40                                                      | 0.10        |      |
| 35 CAMTA1    | calmodulin binding transcription activator 1                                            | 0.10        | 0.35 |
| 36 SFRS1     | splicing factor, arginine/serine-rich 1 (splicing factor 2, alternate splicing factor)  | 0.10        | 0.32 |
| 37 DOC1      | NA                                                                                      | 0.10        |      |
| 38 ZF        | NA                                                                                      | 0.10        |      |
| 39 CCDC77    | coiled-coil domain containing 77                                                        | 0.11        |      |
| 40 C11orf30  | chromosome 11 open reading frame 30                                                     | 0.11        | 0.47 |
| 41 C10orf137 | chromosome 10 open reading frame 137                                                    | 0.11        |      |
| 42 CCDC15    | coiled-coil domain containing 15                                                        | 0.11        | 0.47 |
| 43 TMEM22    | transmembrane protein 22                                                                | 0.11        |      |
| 44 SUV420H1  | suppressor of variegation 4-20 homolog 1 (Drosophila)                                   | 0.11        | 0.21 |
| 45 NUDCD1    | NudC domain containing 1                                                                | 0.11        | 0.35 |
| 46 C8orf4    | chromosome 8 open reading frame 4                                                       | 0.11        | 0.33 |
| 47 CARD8     | caspase recruitment domain family, member 8                                             | 0.11        | 0.12 |
| 48 CLDND1    | claudin domain containing 1                                                             | 0.11        | 0.17 |
| 49 MGA       | MAX gene associated                                                                     | 0.12        | 0.26 |
| 50 MBD5      | methyl-CpG binding domain protein 5                                                     | 0.12        | 0.15 |
| 51 FN5       | NA                                                                                      | 0.12        |      |
| 52 LRIG2     | leucine-rich repeats and immunoglobulin-like domains 2                                  | 0.12        | 0.47 |
| 53 ZNF177    | zinc finger protein 177                                                                 | 0.12        |      |
| 54 SKP2      | S-phase kinase-associated protein 2 (p45)                                               | 0.12        |      |
| 55 FLJ32363  | NA                                                                                      | 0.12        |      |
| 56 LFNG      | lunatic fringe homolog (Drosophila)                                                     | 0.12        | 0.42 |
| 57 TRIP11    | thyroid hormone receptor interactor 11                                                  | 0.12        | 0.25 |
| 58 ARL13B    | ADP-ribosylation factor-like 13B                                                        | 0.12        |      |
| 59 METTL3    | methyltransferase like 3                                                                | 0.12        | 0.32 |
| 60 DOPEY1    | dopey family member 1                                                                   | 0.12        |      |
| 61 FZD2      | frizzled homolog 2 (Drosophila)                                                         | 0.12        | 0.39 |
| 62 EDG2      | endothelial differentiation, lysophosphatidic acid G-protein-coupled receptor, 2        | 0.12        |      |
| 63 RNF146    | ring finger protein 146                                                                 | 0.13        |      |
| 64 TRERF1    | transcriptional regulating factor 1                                                     | 0.13        | 0.34 |
| 65 FLJ22531  | NA                                                                                      | 0.13        |      |
| 66 OIP5      | Opa interacting protein 5                                                               | 0.13        |      |
| 67 FGFR2     | fibroblast growth factor receptor 2 (bacteria-expressed kinase, keratinocyte growth fac | 0.13        |      |

|     |          |                                                                                    |      |      |
|-----|----------|------------------------------------------------------------------------------------|------|------|
| 68  | EXOC6    | exocyst complex component 6                                                        | 0.13 | 0.41 |
| 69  | ZNF512   | zinc finger protein 512                                                            | 0.13 | 0.30 |
| 70  | OGT      | O-linked N-acetylglucosamine (GlcNAc) transferase (UDP-N-acetylglucosamine:polypep | 0.13 | 0.26 |
| 71  | ZNF692   | zinc finger protein 692                                                            | 0.13 | 0.35 |
| 72  | MRPS30   | mitochondrial ribosomal protein S30                                                | 0.13 | 0.39 |
| 73  | SOS1     | son of sevenless homolog 1 (Drosophila)                                            | 0.13 | 0.22 |
| 74  | KMO      | kynurenine 3-monooxygenase (kynurenine 3-hydroxylase)                              | 0.13 |      |
| 75  | GJA7     | gap junction protein, alpha 7, 45kDa (connexin 45)                                 | 0.13 |      |
| 76  | S100PBP  | S100P binding protein                                                              | 0.13 | 0.38 |
| 77  | SBF2     | SET binding factor 2                                                               | 0.13 |      |
| 78  | ARID5B   | AT rich interactive domain 5B (MRF1-like)                                          | 0.13 |      |
| 79  | MAK      | male germ cell-associated kinase                                                   | 0.13 |      |
| 80  | C18orf54 | chromosome 18 open reading frame 54                                                | 0.13 | 0.41 |
| 81  | IERSL    | immediate early response 5-like                                                    | 0.14 |      |
| 82  | APAF1    | apoptotic peptidase activating factor                                              | 0.14 | 0.31 |
| 83  | C1orf63  | chromosome 1 open reading frame 63                                                 | 0.14 | 0.23 |
| 84  | PANK1    | pantothenate kinase 1                                                              | 0.14 | 0.39 |
| 85  | AHSA2    | AHA1, activator of heat shock 90kDa protein ATPase homolog 2 (yeast)               | 0.14 | 0.20 |
| 86  | ANKRD27  | ankyrin repeat domain 27 (VPS9 domain)                                             | 0.14 | 0.42 |
| 87  | ETNK1    | ethanolamine kinase 1                                                              | 0.14 | 0.16 |
| 88  | NOX1     | NADPH oxidase 1                                                                    | 0.14 |      |
| 89  | MECP2    | methyl CpG binding protein 2 (Rett syndrome)                                       | 0.14 |      |
| 90  | RAB4B    | RAB4B, member RAS oncogene family                                                  | 0.14 |      |
| 91  | C10orf6  | chromosome 10 open reading frame 6                                                 | 0.14 |      |
| 92  | HSPBAP1  | HSPB (heat shock 27kDa) associated protein 1                                       | 0.15 |      |
| 93  | ZNF610   | zinc finger protein 610                                                            | 0.15 | 0.26 |
| 94  | WDR76    | WD repeat domain 76                                                                | 0.15 |      |
| 95  | APPBP2   | amyloid beta precursor protein (cytoplasmic tail) binding protein 2                | 0.15 | 0.35 |
| 96  | JARID1A  | Jumonji, AT rich interactive domain 1A (RBBP2-like)                                | 0.15 |      |
| 97  | CIRBP    | cold inducible RNA binding protein                                                 | 0.15 | 0.37 |
| 98  | EFHC1    | EF-hand domain (C-terminal) containing 1                                           | 0.15 | 0.48 |
| 99  | SPOP     | speckle-type POZ protein                                                           | 0.15 | 0.50 |
| 100 | TMTC4    | transmembrane and tetratricopeptide repeat containing 4                            | 0.15 | 0.36 |

\* BE: fold-change in primary bronchial epithelial cells (genes with > 2-fold decrease)

**TABLE 8S - MOST DOWNREGULATED GENES BY CORR-4a IN CFBE41o- CELLS**

| Gene symbol  | Description                                                                             | fold-change |      |
|--------------|-----------------------------------------------------------------------------------------|-------------|------|
|              |                                                                                         | CFBE41o-    | BE * |
| 1 RNU71B     | RNA, U71B small nucleolar                                                               | 0.27        |      |
| 2 C8orf4     | chromosome 8 open reading frame 4                                                       | 0.32        |      |
| 3 CABP4      | calcium binding protein 4                                                               | 0.32        |      |
| 4 EGFR       | epidermal growth factor receptor (erythroblastic leukemia viral (v-erb-b) oncogene hor  | 0.33        |      |
| 5 TCF15      | transcription factor 15 (basic helix-loop-helix)                                        | 0.36        |      |
| 6 ATP2A2     | ATPase, Ca++ transporting, cardiac muscle, slow twitch 2                                | 0.36        |      |
| 7 REST       | RE1-silencing transcription factor                                                      | 0.38        |      |
| 8 IQGAP2     | IQ motif containing GTPase activating protein 2                                         | 0.39        |      |
| 9 TFPI       | tissue factor pathway inhibitor (lipoprotein-associated coagulation inhibitor)          | 0.42        |      |
| 10 EGR1      | early growth response 1                                                                 | 0.42        |      |
| 11 VTCN1     | V-set domain containing T cell activation inhibitor 1                                   | 0.43        |      |
| 12 ZFP64     | zinc finger protein 64 homolog (mouse)                                                  | 0.44        |      |
| 13 TNFSF10   | tumor necrosis factor (ligand) superfamily, member 10                                   | 0.45        |      |
| 14 EHD4      | EH-domain containing 4                                                                  | 0.45        |      |
| 15 PIK3CD    | phosphoinositide-3-kinase, catalytic, delta polypeptide                                 | 0.45        |      |
| 16 CRIP2     | cysteine-rich protein 2                                                                 | 0.45        |      |
| 17 ALPP      | alkaline phosphatase, placental (Regan isozyme)                                         | 0.46        |      |
| 18 DLEU2     | deleted in lymphocytic leukemia, 2                                                      | 0.46        |      |
| 19 TNKS      | tankyrase, TRF1-interacting ankyrin-related ADP-ribose polymerase                       | 0.46        |      |
| 20 TCTE3     | t-complex-associated-testis-expressed 3                                                 | 0.46        |      |
| 21 PRX       | periaxin                                                                                | 0.47        |      |
| 22 TXNIP     | thioredoxin interacting protein                                                         | 0.47        |      |
| 23 SS18L1    | synovial sarcoma translocation gene on chromosome 18-like 1                             | 0.47        |      |
| 24 FGFR2     | fibroblast growth factor receptor 2 (bacteria-expressed kinase, keratinocyte growth fac | 0.47        |      |
| 25 SCN2B     | sodium channel, voltage-gated, type II, beta                                            | 0.48        |      |
| 26 ADCY1     | adenylate cyclase 1 (brain)                                                             | 0.48        |      |
| 27 BTBD3     | BTB (POZ) domain containing 3                                                           | 0.48        |      |
| 28 IGFBP3    | insulin-like growth factor binding protein 3                                            | 0.48        |      |
| 29 ALPPL2    | alkaline phosphatase, placental-like 2                                                  | 0.49        |      |
| 30 NCOA2     | nuclear receptor coactivator 2                                                          | 0.49        |      |
| 31 SEC15L2   | SEC15-like 2 (S. cerevisiae)                                                            | 0.49        |      |
| 32 NUDT16    | nudix (nucleoside diphosphate linked moiety X)-type motif 16                            | 0.49        |      |
| 33 TFRC      | transferrin receptor (p90, CD71)                                                        | 0.49        |      |
| 34 SYNJ2     | synaptojanin 2                                                                          | 0.49        |      |
| 35 GPR153    | G protein-coupled receptor 153                                                          | 0.49        |      |
| 36 LGR5      | leucine-rich repeat-containing G protein-coupled receptor 5                             | 0.49        |      |
| 37 PLCE1     | phospholipase C, epsilon 1                                                              | 0.50        |      |
| 38 ASB12     | ankyrin repeat and SOCS box-containing 12                                               | 0.50        |      |
| 39 PTGER3    | prostaglandin E receptor 3 (subtype EP3)                                                | 0.50        |      |
| 40 ZNF230    | zinc finger protein 230                                                                 | 0.50        |      |
| 41 RFFL      | ring finger and FYVE-like domain containing 1                                           | 0.50        |      |
| 42 STAC3     | SH3 and cysteine rich domain 3                                                          | 0.50        |      |
| 43 C20orf58  | chromosome 20 open reading frame 58                                                     | 0.51        |      |
| 44 BDH1      | 3-hydroxybutyrate dehydrogenase, type 1                                                 | 0.51        |      |
| 45 CAGE1     | cancer antigen 1                                                                        | 0.51        |      |
| 46 C8orf42   | chromosome 8 open reading frame 42                                                      | 0.52        |      |
| 47 MLLT7     | c("myeloid/lymphoid or mixed-lineage leukemia (trithorax homolog, Drosophila)", " tra   | 0.52        |      |
| 48 POU6F1    | POU domain, class 6, transcription factor 1                                             | 0.52        |      |
| 49 CRLF1     | cytokine receptor-like factor 1                                                         | 0.52        |      |
| 50 PNPLA2    | patatin-like phospholipase domain containing 2                                          | 0.52        |      |
| 51 CYP1B1    | cytochrome P450, family 1, subfamily B, polypeptide 1                                   | 0.52        |      |
| 52 PI16      | peptidase inhibitor 16                                                                  | 0.52        |      |
| 53 MKL2      | MKL/myocardin-like 2                                                                    | 0.52        |      |
| 54 EMID2     | EMI domain containing 2                                                                 | 0.53        |      |
| 55 CNOT4     | CCR4-NOT transcription complex, subunit 4                                               | 0.53        |      |
| 56 WWOX      | WW domain containing oxidoreductase                                                     | 0.53        |      |
| 57 GBP1      | guanylate binding protein 1, interferon-inducible, 67kDa                                | 0.54        |      |
| 58 CFB       | complement factor B                                                                     | 0.54        |      |
| 59 ACAA2     | acetyl-Coenzyme A acyltransferase 2 (mitochondrial 3-oxoacyl-Coenzyme A thiolase)       | 0.54        |      |
| 60 C14orf159 | chromosome 14 open reading frame 159                                                    | 0.54        |      |
| 61 BTNL3     | butyrophilin-like 3                                                                     | 0.54        |      |
| 62 PREB      | prolactin regulatory element binding                                                    | 0.54        |      |
| 63 RPL7      | ribosomal protein L7                                                                    | 0.54        |      |
| 64 ZNF606    | zinc finger protein 606                                                                 | 0.54        |      |
| 65 WDR62     | WD repeat domain 62                                                                     | 0.54        |      |
| 66 KLC3      | kinesin light chain 3                                                                   | 0.54        |      |
| 67 TNPO2     | transportin 2 (importin 3, karyopherin beta 2b)                                         | 0.54        |      |

|     |         |                                                                                          |      |
|-----|---------|------------------------------------------------------------------------------------------|------|
| 68  | HEG1    | HEG homolog 1 (zebrafish)                                                                | 0.55 |
| 69  | RBL1    | retinoblastoma-like 1 (p107)                                                             | 0.55 |
| 70  | DLX2    | distal-less homeobox 2                                                                   | 0.55 |
| 71  | PPP4R1L | protein phosphatase 4, regulatory subunit 1-like                                         | 0.55 |
| 72  | ZNF720  | zinc finger protein 720                                                                  | 0.55 |
| 73  | GLUL    | glutamate-ammonia ligase (glutamine synthetase)                                          | 0.55 |
| 74  | MTMR11  | myotubularin related protein 11                                                          | 0.55 |
| 75  | PQBP1   | polyglutamine binding protein 1                                                          | 0.55 |
| 76  | WNT6    | wingless-type MMTV integration site family, member 6                                     | 0.55 |
| 77  | ZNF148  | zinc finger protein 148 (pHZ-52)                                                         | 0.56 |
| 78  | NRG1    | neuregulin 1                                                                             | 0.56 |
| 79  | ABCC3   | ATP-binding cassette, sub-family C (CFTR/MRP), member 3                                  | 0.56 |
| 80  | C1orf69 | chromosome 1 open reading frame 69                                                       | 0.56 |
| 81  | SHPRH   | SNF2 histone linker PHD RING helicase                                                    | 0.56 |
| 82  | ZNF696  | zinc finger protein 696                                                                  | 0.56 |
| 83  | RGS12   | regulator of G-protein signalling 12                                                     | 0.56 |
| 84  | SLC2A3  | solute carrier family 2 (facilitated glucose transporter), member 3                      | 0.56 |
| 85  | SMOX    | spermine oxidase                                                                         | 0.57 |
| 86  | SFTPC   | surfactant, pulmonary-associated protein C                                               | 0.57 |
| 87  | CDKN2B  | cyclin-dependent kinase inhibitor 2B (p15, inhibits CDK4)                                | 0.57 |
| 88  | LRP1    | low density lipoprotein-related protein 1 (alpha-2-macroglobulin receptor)               | 0.57 |
| 89  | SRCRB4D | scavenger receptor cysteine rich domain containing, group B (4 domains)                  | 0.57 |
| 90  | CABC1   | chaperone, ABC1 activity of bc1 complex like (S. pombe)                                  | 0.57 |
| 91  | CLN6    | ceroid-lipofuscinosis, neuronal 6, late infantile, variant                               | 0.57 |
| 92  | ELAVL3  | ELAV (embryonic lethal, abnormal vision, Drosophila)-like 3 (Hu antigen C)               | 0.57 |
| 93  | ANKRD38 | ankyrin repeat domain 38                                                                 | 0.57 |
| 94  | ZFPM1   | zinc finger protein, multitype 1                                                         | 0.57 |
| 95  | TFR2    | transferrin receptor 2                                                                   | 0.57 |
| 96  | LZTR1   | leucine-zipper-like transcription regulator 1                                            | 0.58 |
| 97  | RNF38   | ring finger protein 38                                                                   | 0.58 |
| 98  | RORA    | RAR-related orphan receptor A                                                            | 0.58 |
| 99  | AP1S3   | adaptor-related protein complex 1, sigma 3 subunit                                       | 0.58 |
| 100 | NPR2    | natriuretic peptide receptor B/guanylate cyclase B (atrionatriuretic peptide receptor B) | 0.58 |

\* none of the listed genes was downregulated by corr-4a in primary bronchial epithelial cells
